# Supplementary material for: CA-125 Early Dynamics to Predict Overall Survival in Women with Newly Diagnosed Advanced Ovarian Cancer Based on Meta-Analysis Data
Source: MDPI journal article supplement (doi:10.3390/cancers15061823), 2023-03-17

## Supplementary Materials

Table S1: Description of patients' characteristics (N=5573)

| Variable              |                  | Total (9 trials) |       | Population alive<br>at 3 mois |       | Population alive<br>at 6 mois |       |
|-----------------------|------------------|------------------|-------|-------------------------------|-------|-------------------------------|-------|
| Age                   | n                | 5573             |       | 5209                          |       | 4946                          |       |
|                       | Mean (sd)        | 58.4 (10.8)      |       | 58.3 (10.8)                   |       | 58.2 (10.6)                   |       |
|                       | Median (Q1 ; Q3) | 59 (51 ; 66)     |       | 58.3 (51 ; 66)                |       | 58.1 (51 ; 66)                |       |
|                       | Min ; Max        | 18 ; 88          |       | 18 ; 88                       |       | 21 ; 88                       |       |
| Performance<br>status | n (m.d.)         | 5568 (5)         |       | 5204 (5)                      |       | 4941 (5)                      |       |
|                       | 0                | 2740             | 49.2% | 2597                          | 49.9% | 2523                          | 51.1% |
|                       | 1                | 2376             | 42.7% | 2196                          | 42.2% | 2063                          | 41.7% |
|                       | 2+               | 452              | 8.1%  | 411                           | 7.9%  | 355                           | 7.2%  |
| Figo                  | n (m.d.)         | 5572(1)          |       | 5208(1)                       |       | 4945(1)                       |       |
|                       | Stage I          | 657              | 11.8% | 624                           | 12%   | 625                           | 12.6% |
|                       | Stage II         | 610              | 10.9% | 593                           | 11.4% | 581                           | 11.7% |
|                       | Stage III        | 3401             | 61%   | 3178                          | 61%   | 2993                          | 60.5% |
|                       | Stage IIV        | 904              | 16.2% | 813                           | 15.6% | 746                           | 15.1% |

|                          |                            |             |       |             |       |             |       |
|--------------------------|----------------------------|-------------|-------|-------------|-------|-------------|-------|
| Histological subtype     | n (m.d.)                   | 5568 (5)    |       | 5204 (5)    |       | 4941 (5)    |       |
|                          | Serous carcinoma           | 2778        | 49.9% | 2641        | 50.7% | 2546        | 51.5% |
|                          | Endometrioid               | 504         | 9.1%  | 475         | 9.1%  | 461         | 9.3%  |
|                          | Mucinous                   | 154         | 2.8%  | 127         | 2.4%  | 113         | 2.3%  |
|                          | Clear cell                 | 881         | 15.8% | 822         | 15.8% | 787         | 15.9% |
|                          | Other                      | 1111        | 20%   | 1009        | 19.4% | 917         | 18.6% |
|                          | Unknown                    | 140         | 2.5%  | 130         | 2.5%  | 117         | 2.4%  |
| Histological grade       | n (m.d.)                   | 4275 (1298) |       | 4019 (1190) |       | 3813 (1133) |       |
|                          | Well differentiated        | 451         | 10.5% | 426         | 10.6% | 408         | 10.7% |
|                          | Moderate differentiated    | 1112        | 26%   | 1051        | 26.2% | 991         | 26%   |
|                          | Poorly/Undifferentiated    | 2712        | 63.4% | 2542        | 63.2% | 2414        | 63.3% |
| Surgical procedure       | n (m.d.)                   | 5020(553)   |       | 4727 (482)  |       | 4450 (496)  |       |
|                          | Primary complete resection | 4366        | 87%   | 4111        | 87%   | 3885        | 87.3% |
|                          | Delayed surgery            | 161         | 3.2%  | 144         | 3.0%  | 124         | 4.8%  |
|                          | No surgery                 | 493         | 9.8%  | 472         | 10%   | 441         | 9.9%  |
| Maximal residual disease | n (m.d.)                   | 4909(664)   |       | 4621 (588)  |       | 4350 (596)  |       |
|                          | <1cm                       | 2356        | 48%   | 2267        | 49.1% | 2209        | 50.8% |
|                          | >=1cm                      | 2526        | 51.5% | 2329        | 50.4% | 2119        | 48.7% |
|                          | Unknown                    | 27          | 0.6%  | 25          | 0.5%  | 22          | 0.5%  |

|                                                |                                       |                    |                    |                    |
|------------------------------------------------|---------------------------------------|--------------------|--------------------|--------------------|
| Assessment of progression                      | n                                     | 5573               | 5209               | 4946               |
|                                                | CT-scan                               | 632 11.3%          | 598 11.5%          | 598 12.1%          |
|                                                | CA-125-Clinical(confirmation with CT) | 3712 66.6%         | 3483 66.9%         | 3247 65.6%         |
|                                                | Both                                  | 1229 22.1%         | 1128 21.7%         | 1101 22.3%         |
| CA-125 at baseline                             | n                                     | 5573               | 5209               | 4946               |
|                                                | Mean (sd)                             | 687.50 (1552.73)   | 683.05 (1542.01)   | 653.64 (1481.97)   |
|                                                | Median (Q1 ; Q3)                      | 144 (44 ; 539.24)  | 142 (43 ; 532)     | 136 (41 ; 501)     |
|                                                | Min ; Max                             | 0.82 ; 14400       | 0.82 ; 14400       | 0.82 ; 14400       |
| log(CA-125 +1) at baseline                     | n                                     | 5573               | 5209               | 4946               |
|                                                | Mean (sd)                             | 5.12 (1.69)        | 5.11 (1.69)        | 5.06 (1.69)        |
|                                                | Median (Q1 ; Q3)                      | 4.98 (3.81 ; 6.29) | 4.96 (3.78 ; 6.28) | 4.92 (3.74 ; 6.22) |
|                                                | Min ; Max                             | 0.60 ; 9.58        | 0.60 ; 9.58        | 0.60 ; 9.58        |
| number of repeated CA-125 measures per patient | n                                     | 5573               | 5209               | 4946               |
|                                                | Mean (sd)                             | 13.09              | 13.58              | 13.74              |
|                                                | Median (Q1 ; Q3)                      | 11 (7 ; 17)        | 12 (7 ; 17)        | 12 (7 ; 18)        |
|                                                | Min ; Max                             | 2 ; 100            | 2 ; 80             | 2 ; 80             |

---

Table S2 : 10-fold cross-validated AUC (A,B) and Brier score (C,D) for the prediction of overall survival at 24, 36, 48 and 60 months from CA125 history up to 3 months when considering different CA125 summaries

| A. AUC   | Time        | T=24                  | T=36                  | T=48                  | T=60                  |
|----------|-------------|-----------------------|-----------------------|-----------------------|-----------------------|
|          | Null model  | 0.648 [0.593 ; 0.702] | 0.665 [0.608 ; 0.717] | 0.654 [0.594 ; 0.711] | 0.586 [0.51 ; 0.652]  |
|          | ORD         | 0.646 [0.59 ; 0.697]  | 0.668 [0.611 ; 0.724] | 0.657 [0.599 ; 0.711] | 0.591 [0.514 ; 0.659] |
|          | OVLT        | 0.749 [0.702 ; 0.796] | 0.751 [0.704 ; 0.801] | 0.746 [0.69 ; 0.799]  | 0.695 [0.634 ; 0.753] |
|          | EVLTL       | 0.745 [0.699 ; 0.796] | 0.746 [0.698 ; 0.794] | 0.741 [0.688 ; 0.795] | 0.691 [0.631 ; 0.75]  |
|          | ESB         | 0.685 [0.637 ; 0.739] | 0.691 [0.635 ; 0.749] | 0.689 [0.633 ; 0.745] | 0.632 [0.572 ; 0.701] |
|          | ESLT        | 0.668 [0.616 ; 0.722] | 0.689 [0.635 ; 0.743] | 0.694 [0.639 ; 0.748] | 0.643 [0.583 ; 0.707] |
|          |             |                       |                       |                       |                       |
| B. AUC   | Null model* | 0.703 [0.658 ; 0.752] | 0.717 [0.664 ; 0.771] | 0.716 [0.663 ; 0.77]  | 0.669 [0.604 ; 0.725] |
|          | ORD*        | 0.738 [0.693 ; 0.789] | 0.742 [0.69 ; 0.791]  | 0.743 [0.689 ; 0.798] | 0.7 [0.64 ; 0.763]    |
|          | OVLT*       | 0.749 [0.705 ; 0.796] | 0.754 [0.704 ; 0.804] | 0.75 [0.696 ; 0.801]  | 0.703 [0.644 ; 0.762] |
|          | EVLTL*      | 0.745 [0.701 ; 0.794] | 0.75 [0.701 ; 0.799]  | 0.746 [0.691 ; 0.801] | 0.7 [0.641 ; 0.756]   |
|          | ESB*        | 0.723 [0.677 ; 0.77]  | 0.734 [0.682 ; 0.787] | 0.738 [0.68 ; 0.792]  | 0.696 [0.635 ; 0.752] |
|          | ESLT*       | 0.704 [0.658 ; 0.752] | 0.718 [0.665 ; 0.772] | 0.719 [0.665 ; 0.773] | 0.672 [0.608 ; 0.73]  |
|          |             |                       |                       |                       |                       |
| C. Brier | Null Model  | 0.193 [0.174 ; 0.212] | 0.225 [0.212 ; 0.239] | 0.234 [0.222 ; 0.247] | 0.252 [0.236 ; 0.269] |
|          | ORD         | 0.193 [0.174 ; 0.212] | 0.225 [0.212 ; 0.239] | 0.234 [0.222 ; 0.247] | 0.252 [0.236 ; 0.269] |
|          | OVLT        | 0.171 [0.153 ; 0.191] | 0.199 [0.181 ; 0.216] | 0.205 [0.188 ; 0.223] | 0.223 [0.204 ; 0.243] |
|          | EVLTL       | 0.172 [0.153 ; 0.191] | 0.2 [0.183 ; 0.217]   | 0.206 [0.189 ; 0.224] | 0.223 [0.204 ; 0.242] |
|          | ESB         | 0.186 [0.169 ; 0.206] | 0.217 [0.202 ; 0.231] | 0.224 [0.209 ; 0.239] | 0.241 [0.225 ; 0.261] |
|          | ESLT        | 0.189 [0.171 ; 0.209] | 0.218 [0.204 ; 0.233] | 0.224 [0.21 ; 0.238]  | 0.24 [0.224 ; 0.257]  |
|          |             |                       |                       |                       |                       |
| D. Brier | Null model* | 0.182 [0.164 ; 0.2]   | 0.208 [0.192 ; 0.225] | 0.214 [0.198 ; 0.232] | 0.23 [0.212 ; 0.252]  |
|          | ORD*        | 0.173 [0.154 ; 0.192] | 0.201 [0.183 ; 0.218] | 0.205 [0.186 ; 0.224] | 0.22 [0.201 ; 0.24]   |
|          | OVLT*       | 0.172 [0.153 ; 0.19]  | 0.198 [0.18 ; 0.216]  | 0.204 [0.186 ; 0.223] | 0.22 [0.202 ; 0.24]   |
|          | EVLTL*      | 0.172 [0.153 ; 0.191] | 0.199 [0.181 ; 0.216] | 0.204 [0.186 ; 0.224] | 0.22 [0.202 ; 0.24]   |
|          | ESB*        | 0.178 [0.16 ; 0.197]  | 0.204 [0.188 ; 0.221] | 0.208 [0.19 ; 0.227]  | 0.223 [0.205 ; 0.244] |
|          | ESLT*       | 0.182 [0.164 ; 0.201] | 0.208 [0.192 ; 0.225] | 0.214 [0.197 ; 0.231] | 0.229 [0.212 ; 0.251] |

Null model: survival model stratified on study, ORD: Observed relative decline, OVLT: Observed Value at landmark time, EVLT: Estimated value at landmark time, ESB: Estimated slope at baseline, ESLT: Estimated slope at landmark time

\* models with CA-125 at baseline

Table S3: 10-fold cross-validated AUC (A,B) and Brier score (C,D) for the prediction of overall survival at 24, 36, 48 and 60 months from CA125 history up to 6 months when considering different CA125 summaries (Landmark time 6 months)

|          | Time        | T=24                  | T=36                  | T=48                  | T=60                  |
|----------|-------------|-----------------------|-----------------------|-----------------------|-----------------------|
|          | Null model  | 0.639 [0.574 ; 0.699] | 0.646 [0.58 ; 0.704]  | 0.667 [0.606 ; 0.728] | 0.603 [0.527 ; 0.672] |
| A. AUC   | ORD         | 0.643 [0.579 ; 0.703] | 0.638 [0.575 ; 0.698] | 0.665 [0.606 ; 0.726] | 0.625 [0.556 ; 0.696] |
|          | OVLT        | 0.735 [0.683 ; 0.783] | 0.71 [0.653 ; 0.762]  | 0.712 [0.654 ; 0.765] | 0.66 [0.59 ; 0.734]   |
|          | EVLT        | 0.731 [0.678 ; 0.778] | 0.708 [0.648 ; 0.757] | 0.709 [0.652 ; 0.762] | 0.656 [0.586 ; 0.734] |
|          | ESB         | 0.677 [0.615 ; 0.731] | 0.663 [0.598 ; 0.72]  | 0.683 [0.618 ; 0.735] | 0.639 [0.564 ; 0.706] |
|          | ESLT        | 0.636 [0.574 ; 0.696] | 0.624 [0.555 ; 0.686] | 0.649 [0.591 ; 0.714] | 0.593 [0.511 ; 0.667] |
|          |             |                       |                       |                       |                       |
| B. AUC   | Null model* | 0.708 [0.65 ; 0.761]  | 0.709 [0.652 ; 0.762] | 0.717 [0.656 ; 0.771] | 0.675 [0.609 ; 0.74]  |
|          | ORD*        | 0.73 [0.675 ; 0.779]  | 0.717 [0.66 ; 0.767]  | 0.727 [0.67 ; 0.783]  | 0.686 [0.616 ; 0.756] |
|          | OVLT*       | 0.746 [0.698 ; 0.791] | 0.73 [0.672 ; 0.778]  | 0.733 [0.674 ; 0.786] | 0.692 [0.621 ; 0.755] |
|          | EVLT*       | 0.744 [0.695 ; 0.791] | 0.729 [0.672 ; 0.776] | 0.732 [0.673 ; 0.784] | 0.69 [0.619 ; 0.76]   |
|          | ESB*        | 0.723 [0.67 ; 0.773]  | 0.714 [0.655 ; 0.767] | 0.728 [0.668 ; 0.777] | 0.697 [0.636 ; 0.761] |
|          | ESLT*       | 0.709 [0.652 ; 0.762] | 0.7 [0.644 ; 0.752]   | 0.709 [0.648 ; 0.767] | 0.671 [0.604 ; 0.74]  |
|          |             |                       |                       |                       |                       |
| C. Brier | Null Model  | 0.193 [0.174 ; 0.212] | 0.226 [0.212 ; 0.24]  | 0.234 [0.221 ; 0.247] | 0.251 [0.235 ; 0.269] |
|          | ORD         | 0.193 [0.174 ; 0.212] | 0.227 [0.212 ; 0.241] | 0.236 [0.223 ; 0.249] | 0.25 [0.235 ; 0.268]  |
|          | OVLT        | 0.171 [0.151 ; 0.191] | 0.204 [0.187 ; 0.224] | 0.215 [0.199 ; 0.233] | 0.232 [0.211 ; 0.254] |
|          | EVLT        | 0.171 [0.151 ; 0.192] | 0.204 [0.187 ; 0.224] | 0.216 [0.199 ; 0.234] | 0.233 [0.211 ; 0.254] |
|          | ESB         | 0.188 [0.169 ; 0.207] | 0.22 [0.205 ; 0.237]  | 0.227 [0.213 ; 0.245] | 0.241 [0.222 ; 0.263] |
|          | ESLT        | 0.193 [0.174 ; 0.212] | 0.227 [0.212 ; 0.242] | 0.236 [0.223 ; 0.25]  | 0.252 [0.235 ; 0.269] |
|          |             |                       |                       |                       |                       |
| D. Brier | Null model* | 0.181 [0.161 ; 0.2]   | 0.208 [0.191 ; 0.228] | 0.214 [0.196 ; 0.234] | 0.229 [0.209 ; 0.251] |
|          | ORD*        | 0.174 [0.153 ; 0.194] | 0.204 [0.186 ; 0.225] | 0.211 [0.193 ; 0.231] | 0.227 [0.203 ; 0.25]  |
|          | OVLT*       | 0.169 [0.149 ; 0.188] | 0.199 [0.182 ; 0.219] | 0.208 [0.191 ; 0.227] | 0.223 [0.202 ; 0.246] |
|          | EVLT*       | 0.169 [0.148 ; 0.189] | 0.199 [0.182 ; 0.219] | 0.209 [0.192 ; 0.226] | 0.224 [0.202 ; 0.247] |
|          | ESB*        | 0.178 [0.159 ; 0.196] | 0.207 [0.189 ; 0.227] | 0.212 [0.194 ; 0.232] | 0.223 [0.202 ; 0.245] |
|          | ESLT*       | 0.18 [0.16 ; 0.198]   | 0.209 [0.192 ; 0.228] | 0.217 [0.199 ; 0.236] | 0.23 [0.209 ; 0.253]  |

Null model: survival model stratified on study, ORD: observed relative decline, OVLT: observed value at landmark time, EVLT: estimated value at landmark time, ESB: estimated slope at baseline, ESLT: Estimated slope at landmark time

\* models with CA-125 at baseline

Figure S1: Calibration plot for the observed rate of decline (ORD) - 3 months

### Calibration - ORD

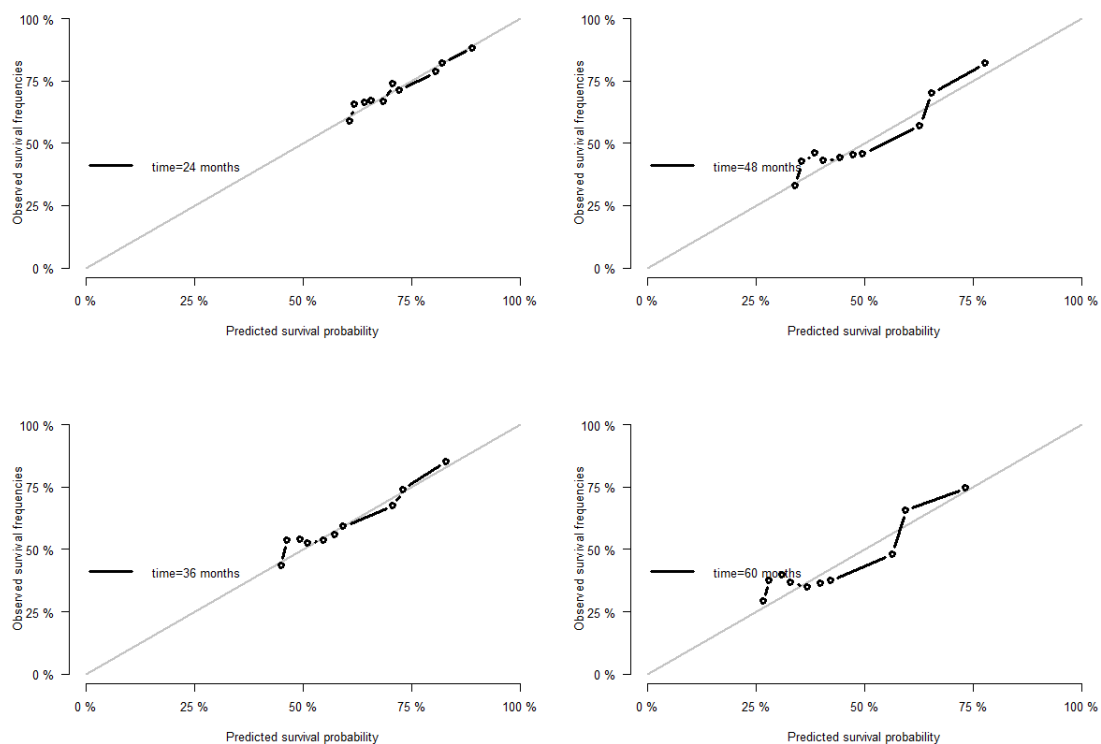

Figure S2: Calibration plot for the observed value at landmark time (OVL) - 3 months

### Calibration - OVL

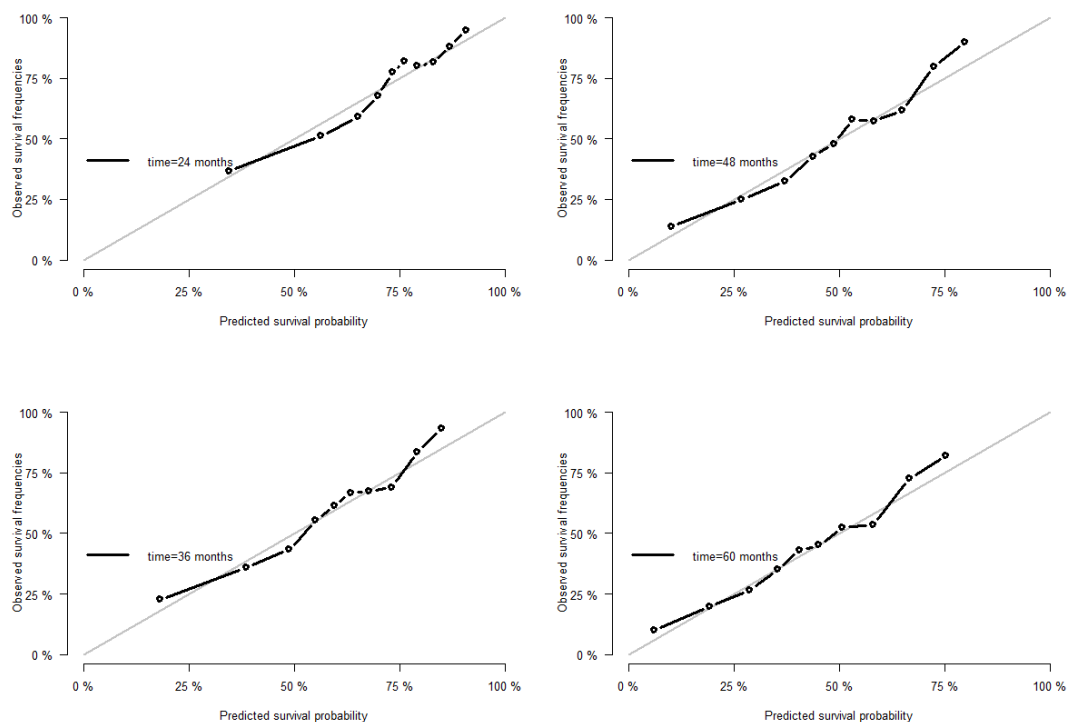

Figure S3: Calibration plot for the estimated value at landmark time (EVL) - 3 months

### Calibration - EVLT

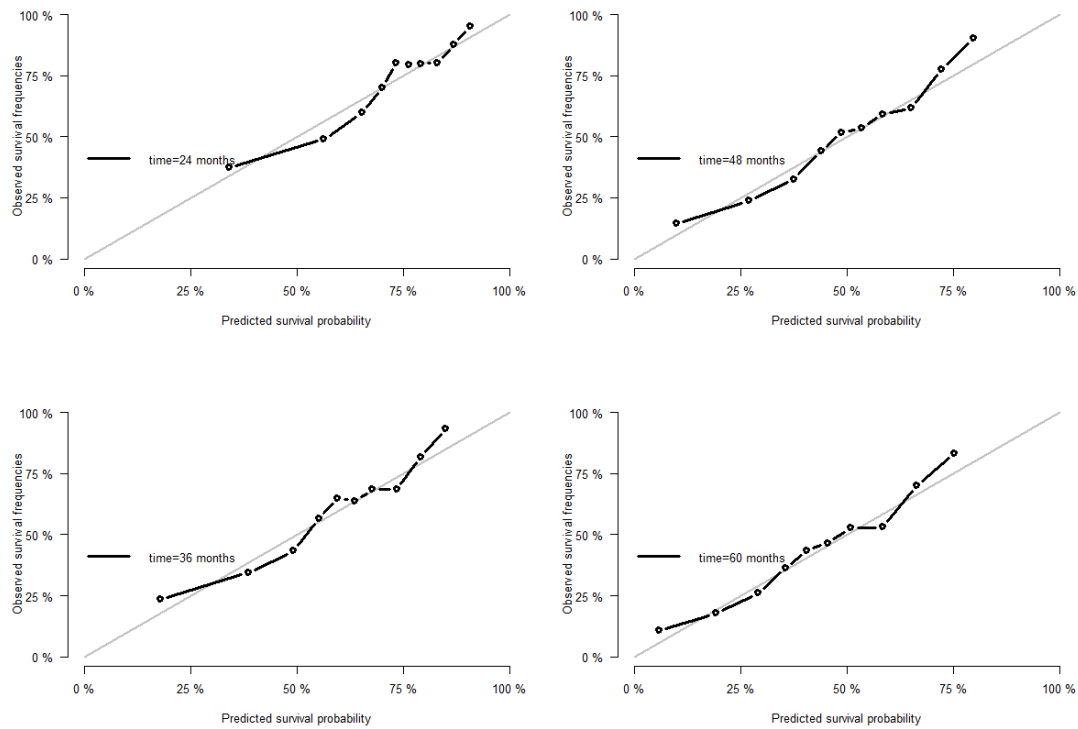

Figure S4: Calibration plot for the estimated slope at baseline (ESB) (for landmark 3 months)

### Calibration - ESB

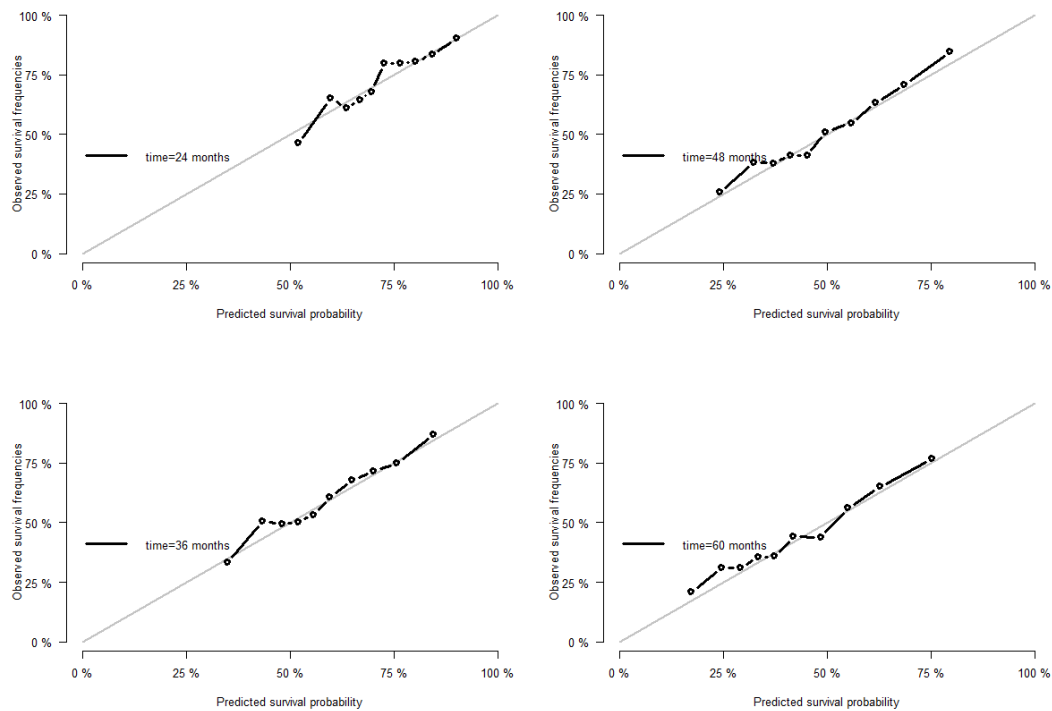

Figure S5: Calibration plot for the estimated slope at landmark time (ESLT)-3 months

## Calibration - ESLT

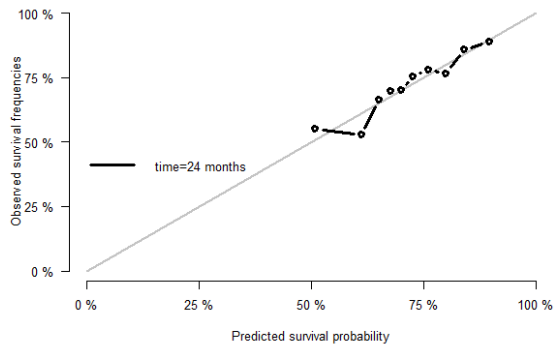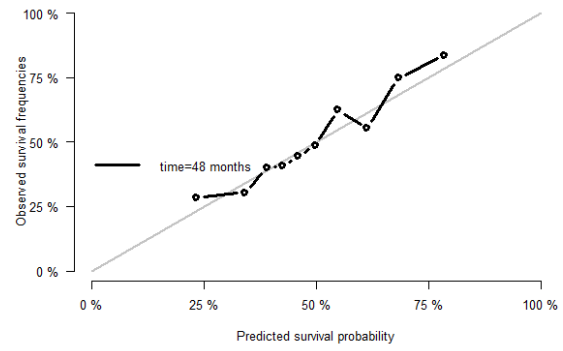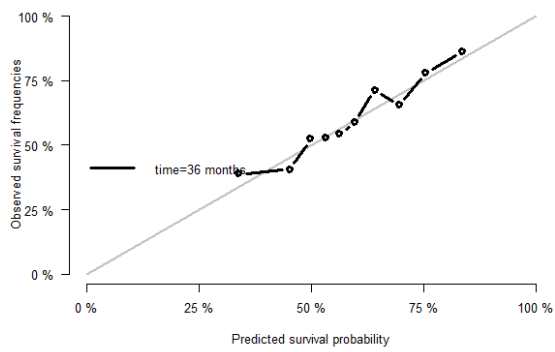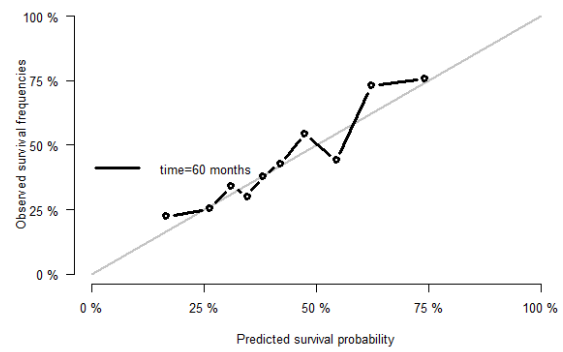



Table S4: Predictive performances by subgroups for estimated CA-125 value at 3 months

| A. AUC   | Time          | T=24                  | T=36                  | T=48                  | T=60                  |
|----------|---------------|-----------------------|-----------------------|-----------------------|-----------------------|
|          | Fig0 I & II   | 0.684 [0.446 ; 0.878] | 0.653 [0.467 ; 0.839] | 0.683 [0.495 ; 0.861] | 0.581 [0.338 ; 0.833] |
|          | Fig0 III      | 0.709 [0.64 ; 0.772]  | 0.694 [0.621 ; 0.766] | 0.714 [0.645 ; 0.78]  | 0.651 [0.569 ; 0.725] |
|          | Fig0 IV       | 0.688 [0.563 ; 0.798] | 0.692 [0.548 ; 0.816] | 0.698 [0.524 ; 0.847] | 0.69 [0.506 ; 0.861]  |
|          | Res Dis <1cm  | 0.687 [0.589 ; 0.79]  | 0.679 [0.577 ; 0.771] | 0.698 [0.606 ; 0.788] | 0.649 [0.553 ; 0.748] |
|          | Res Dis >=1cm | 0.707 [0.634 ; 0.768] | 0.707 [0.629 ; 0.782] | 0.72 [0.632 ; 0.796]  | 0.662 [0.548 ; 0.763] |
| B. Brier | Time          | T=24                  | T=36                  | T=48                  | T=60                  |
|          | Fig0 I & II   | 0.091 [0.062 ; 0.123] | 0.132 [0.097 ; 0.168] | 0.162 [0.124 ; 0.207] | 0.204 [0.156 ; 0.258] |
|          | Fig0 III      | 0.19 [0.167 ; 0.214]  | 0.221 [0.197 ; 0.246] | 0.216 [0.196 ; 0.239] | 0.231 [0.21 ; 0.254]  |
|          | Fig0 IV       | 0.235 [0.187 ; 0.286] | 0.23 [0.189 ; 0.276]  | 0.201 [0.156 ; 0.241] | 0.181 [0.142 ; 0.228] |
|          | Res Dis <1cm  | 0.124 [0.099 ; 0.151] | 0.175 [0.148 ; 0.2]   | 0.2 [0.175 ; 0.224]   | 0.23 [0.203 ; 0.256]  |
|          | Res Dis >=1cm | 0.218 [0.193 ; 0.247] | 0.224 [0.201 ; 0.249] | 0.205 [0.182 ; 0.233] | 0.211 [0.182 ; 0.243] |

Figure S6 : Predictive performances measured by AUC (A) and Brier Score (B) by subgroups for estimated CA-125 value at 3 months

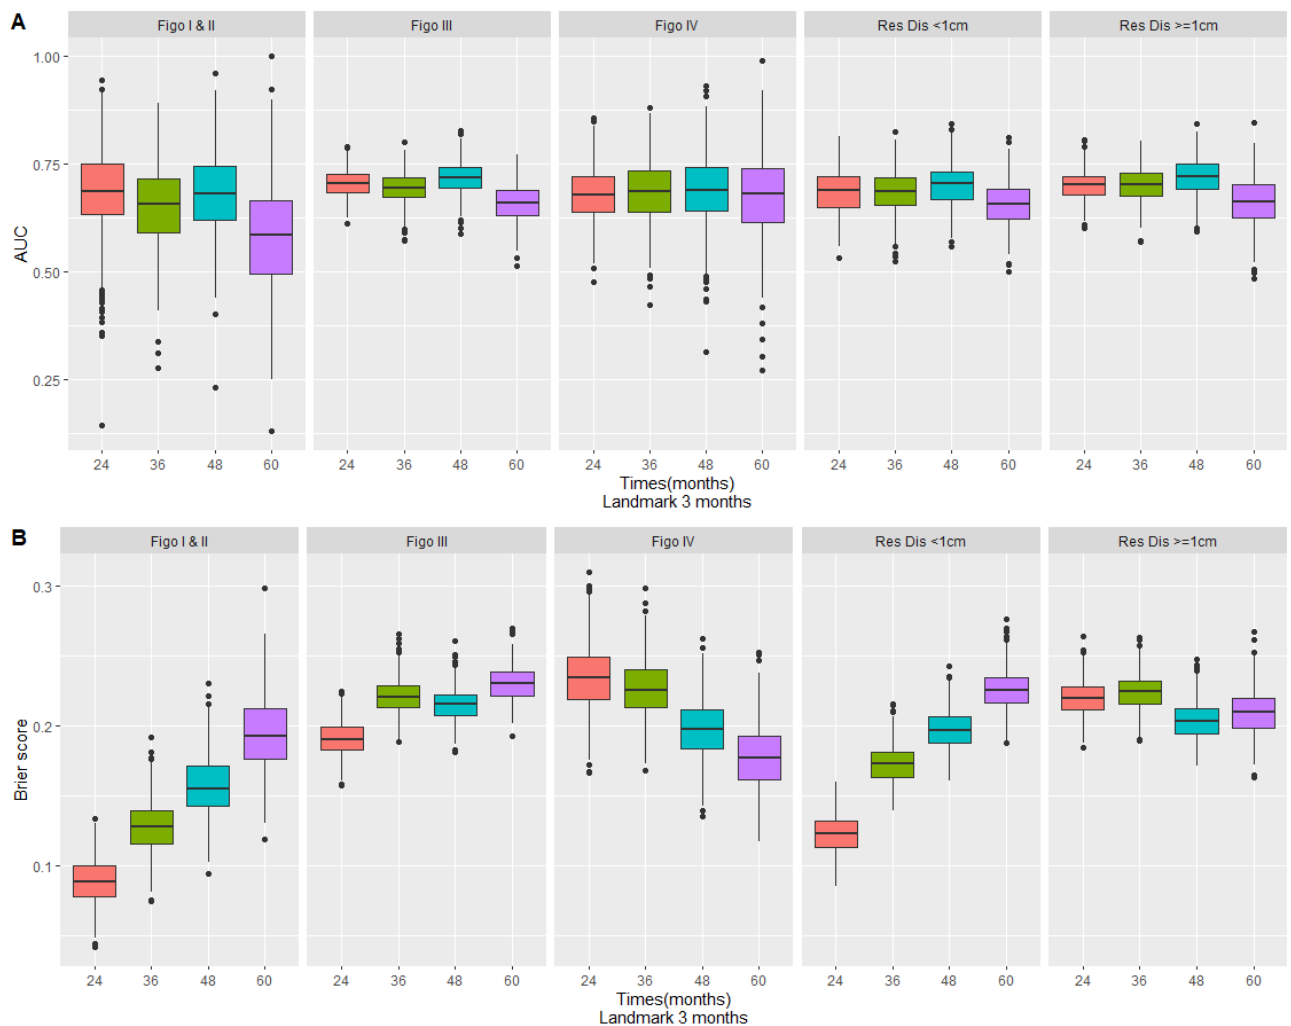

Table S5: Predictive performances by subgroups for estimated CA-125 value at 6 months

| A. AUC   | Time         | T=24                  | T=36                  | T=48                  | T=60                  |
|----------|--------------|-----------------------|-----------------------|-----------------------|-----------------------|
|          | Figo I & II  | 0.649 [0.442 ; 0.85]  | 0.656 [0.435 ; 0.843] | 0.665 [0.443 ; 0.85]  | 0.553 [0.311 ; 0.8]   |
|          | Figo III     | 0.7 [0.636 ; 0.767]   | 0.682 [0.599 ; 0.745] | 0.681 [0.61 ; 0.758]  | 0.627 [0.53 ; 0.712]  |
|          | Figo IV      | 0.688 [0.55 ; 0.821]  | 0.678 [0.518 ; 0.818] | 0.684 [0.499 ; 0.858] | 0.653 [0.433 ; 0.877] |
|          | Res Dis <1cm | 0.682 [0.591 ; 0.771] | 0.674 [0.587 ; 0.759] | 0.683 [0.596 ; 0.765] | 0.622 [0.519 ; 0.721] |
|          | Res Dis ≥1cm | 0.704 [0.63 ; 0.775]  | 0.691 [0.592 ; 0.774] | 0.687 [0.589 ; 0.777] | 0.632 [0.509 ; 0.741] |
| B. Brier | Time         | T=24                  | T=36                  | T=48                  | T=60                  |
|          | Figo I & II  | 0.093 [0.063 ; 0.123] | 0.134 [0.099 ; 0.172] | 0.171 [0.13 ; 0.219]  | 0.223 [0.169 ; 0.282] |
|          | Figo III     | 0.19 [0.166 ; 0.215]  | 0.222 [0.198 ; 0.246] | 0.225 [0.203 ; 0.245] | 0.237 [0.213 ; 0.263] |
|          | Figo IV      | 0.233 [0.177 ; 0.295] | 0.236 [0.191 ; 0.285] | 0.212 [0.166 ; 0.252] | 0.198 [0.148 ; 0.246] |
|          | Res Dis <1cm | 0.126 [0.103 ; 0.152] | 0.177 [0.154 ; 0.203] | 0.207 [0.184 ; 0.232] | 0.241 [0.212 ; 0.272] |
|          | Res Dis ≥1cm | 0.218 [0.192 ; 0.25]  | 0.229 [0.201 ; 0.26]  | 0.217 [0.191 ; 0.243] | 0.219 [0.188 ; 0.251] |

Figure S7 : Predictive performances measured by AUC (A) and Brier Score (B) by subgroups for estimated CA-125 value at 6 months

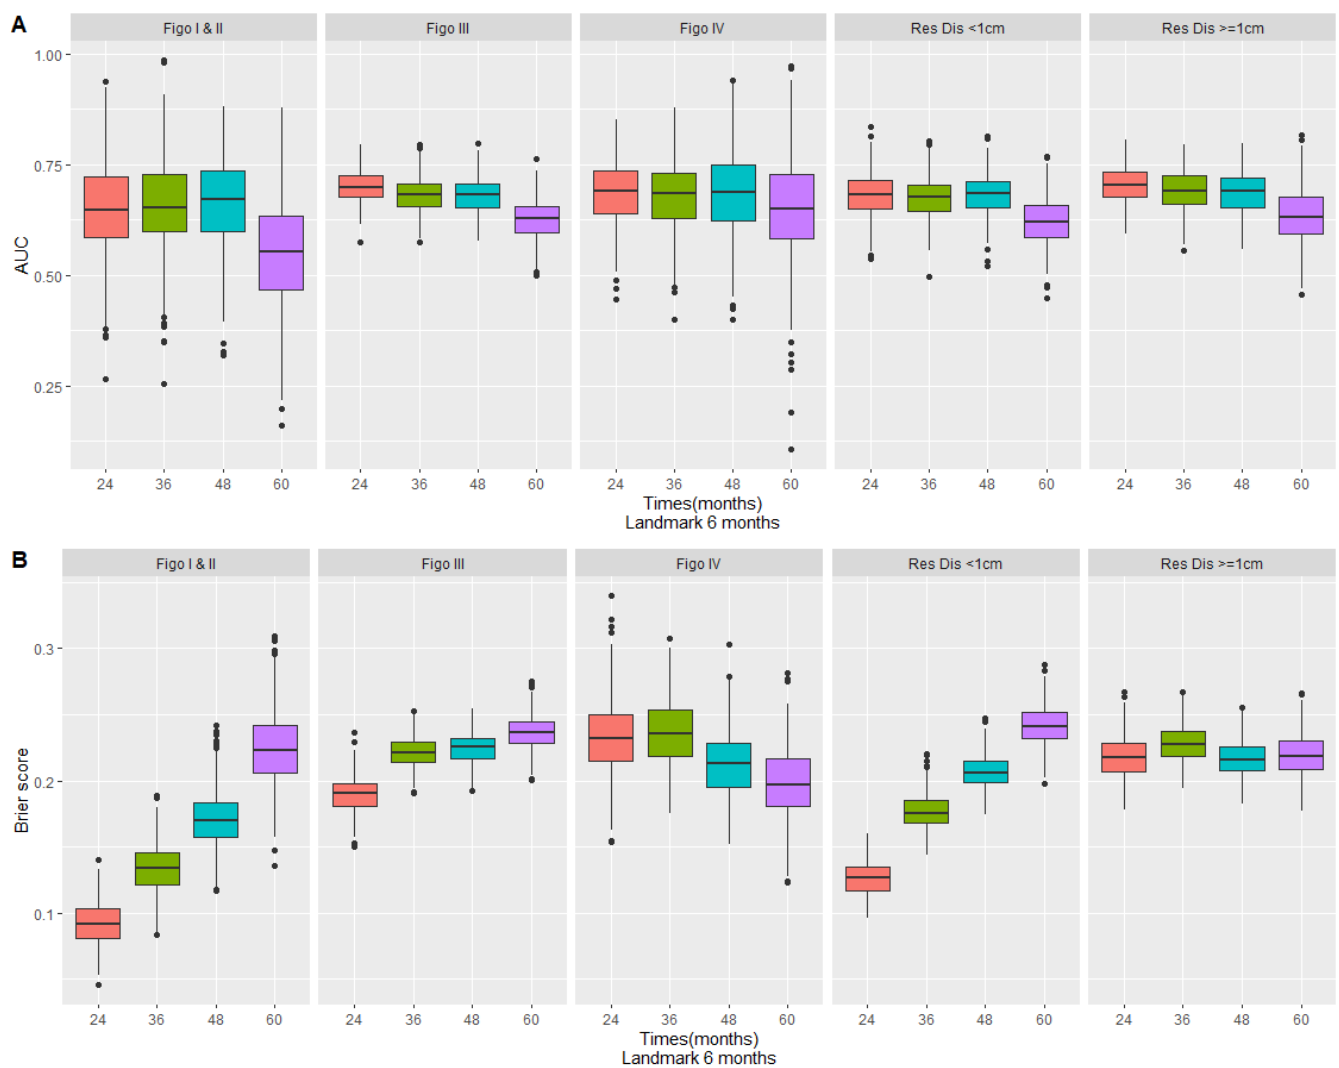

Table S6: 5-fold cross-validated AUC (A,B) and Brier score (C,D) for the prediction of overall survival at 24, 36, 48 and 60 months from CA125 history up to 3 months when considering different CA125 summaries. Half population including only Standard regimen arm

| A. AUC   | Time        | T=24                  | T=36                  | T=48                  | T=60                  |
|----------|-------------|-----------------------|-----------------------|-----------------------|-----------------------|
|          | Null model  | 0.592 [0.51 ; 0.667]  | 0.6 [0.522 ; 0.667]   | 0.588 [0.512 ; 0.656] | 0.536 [0.46 ; 0.603]  |
|          | ORD         | 0.585 [0.503 ; 0.672] | 0.604 [0.53 ; 0.67]   | 0.592 [0.505 ; 0.671] | 0.544 [0.461 ; 0.624] |
|          | OVL         | 0.714 [0.618 ; 0.793] | 0.702 [0.613 ; 0.77]  | 0.7 [0.603 ; 0.769]   | 0.663 [0.575 ; 0.742] |
|          | EVL         | 0.712 [0.618 ; 0.791] | 0.701 [0.616 ; 0.769] | 0.701 [0.608 ; 0.773] | 0.667 [0.584 ; 0.745] |
|          | ESB         | 0.642 [0.548 ; 0.739] | 0.636 [0.554 ; 0.706] | 0.629 [0.548 ; 0.699] | 0.582 [0.501 ; 0.657] |
|          | ESLT        | 0.634 [0.547 ; 0.73]  | 0.645 [0.565 ; 0.716] | 0.638 [0.558 ; 0.712] | 0.595 [0.511 ; 0.671] |
|          |             |                       |                       |                       |                       |
| B. AUC   | Null model* | 0.67 [0.587 ; 0.752]  | 0.687 [0.608 ; 0.761] | 0.691 [0.599 ; 0.777] | 0.662 [0.584 ; 0.74]  |
|          | ORD*        | 0.695 [0.598 ; 0.779] | 0.706 [0.621 ; 0.778] | 0.715 [0.628 ; 0.792] | 0.687 [0.608 ; 0.764] |
|          | OVL*        | 0.713 [0.619 ; 0.792] | 0.713 [0.628 ; 0.782] | 0.716 [0.625 ; 0.792] | 0.685 [0.599 ; 0.762] |
|          | EVL*        | 0.711 [0.618 ; 0.793] | 0.712 [0.629 ; 0.78]  | 0.716 [0.625 ; 0.792] | 0.686 [0.604 ; 0.759] |
|          | ESB*        | 0.683 [0.595 ; 0.765] | 0.696 [0.612 ; 0.768] | 0.699 [0.609 ; 0.774] | 0.671 [0.592 ; 0.749] |
|          | ESLT*       | 0.67 [0.587 ; 0.751]  | 0.686 [0.607 ; 0.761] | 0.69 [0.596 ; 0.771]  | 0.661 [0.584 ; 0.741] |
|          |             |                       |                       |                       |                       |
| C. Brier | Null Model  | 0.162 [0.131 ; 0.196] | 0.216 [0.193 ; 0.24]  | 0.243 [0.225 ; 0.265] | 0.263 [0.246 ; 0.29]  |
|          | ORD         | 0.163 [0.132 ; 0.196] | 0.217 [0.195 ; 0.24]  | 0.244 [0.225 ; 0.266] | 0.263 [0.246 ; 0.289] |
|          | OVL         | 0.153 [0.124 ; 0.185] | 0.197 [0.17 ; 0.229]  | 0.213 [0.19 ; 0.244]  | 0.232 [0.21 ; 0.262]  |
|          | EVL         | 0.152 [0.124 ; 0.185] | 0.197 [0.169 ; 0.229] | 0.212 [0.189 ; 0.244] | 0.231 [0.21 ; 0.259]  |
|          | ESB         | 0.16 [0.13 ; 0.193]   | 0.212 [0.188 ; 0.236] | 0.236 [0.217 ; 0.261] | 0.256 [0.236 ; 0.281] |
|          | ESLT        | 0.161 [0.13 ; 0.194]  | 0.211 [0.187 ; 0.236] | 0.235 [0.216 ; 0.258] | 0.254 [0.233 ; 0.277] |
|          |             |                       |                       |                       |                       |
| D. Brier | Null model* | 0.158 [0.127 ; 0.191] | 0.203 [0.177 ; 0.229] | 0.22 [0.194 ; 0.249]  | 0.235 [0.21 ; 0.265]  |
|          | ORD*        | 0.153 [0.126 ; 0.188] | 0.196 [0.169 ; 0.224] | 0.209 [0.184 ; 0.239] | 0.226 [0.201 ; 0.253] |
|          | OVL*        | 0.153 [0.125 ; 0.187] | 0.196 [0.168 ; 0.227] | 0.21 [0.186 ; 0.242]  | 0.227 [0.204 ; 0.257] |
|          | EVL*        | 0.153 [0.125 ; 0.187] | 0.195 [0.167 ; 0.226] | 0.209 [0.185 ; 0.243] | 0.226 [0.203 ; 0.255] |
|          | ESB*        | 0.156 [0.126 ; 0.191] | 0.201 [0.175 ; 0.227] | 0.217 [0.193 ; 0.245] | 0.233 [0.209 ; 0.261] |
|          | ESLT*       | 0.158 [0.127 ; 0.191] | 0.203 [0.177 ; 0.229] | 0.22 [0.194 ; 0.25]   | 0.236 [0.21 ; 0.265]  |

Null model: survival model stratified on study, ORD: observed relative decline, OVL: observed value at landmark time, EVL: estimated value at landmark time, ESB: estimated slope at baseline, ESLT: estimated slope at landmark time

\* models with CA-125 at baseline

Figure S8: 5-fold cross-validated AUC (A,B) and Brier score (C,D) for the prediction of overall survival at 24, 36, 48 and 60 months from CA125 history up to 3 months in Standard regimen arm when considering different CA125 summaries (ORD, OVLT, EVLT, ESB, ESLT) adjusted (B,D) or not (A,C) on the CA125 value at baseline. *\* models with CA-125 at baseline*

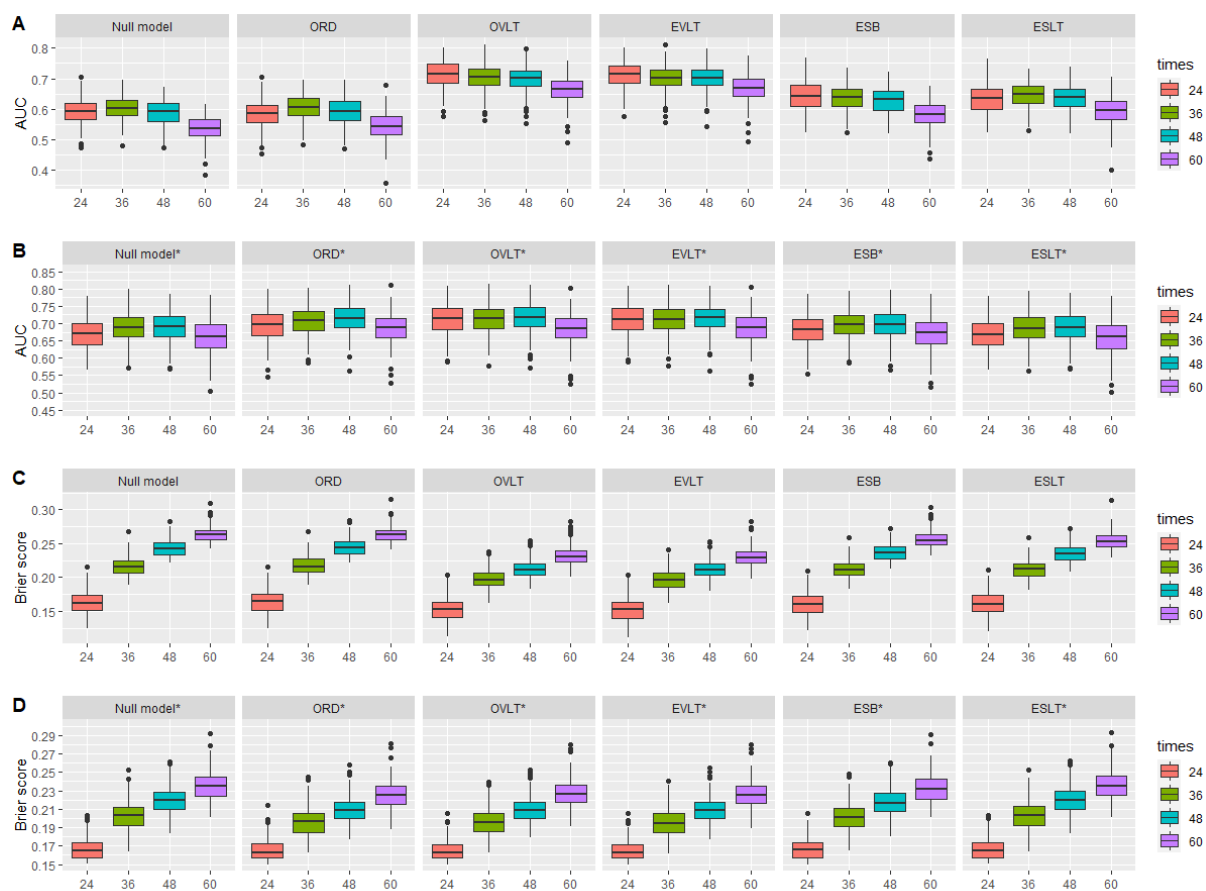

Table S7: 5-fold cross-validated AUC (A,B) and Brier score (C,D) for the prediction of overall survival at 24, 36, 48 and 60 months from CA125 history up to 6 months when considering different CA125 summaries. Half population including only Standard regimen arm

| A. AUC   | Time        | T=24                  | T=36                  | T=48                  | T=60                  |
|----------|-------------|-----------------------|-----------------------|-----------------------|-----------------------|
|          | Null model  | 0.588 [0.53 ; 0.649]  | 0.589 [0.539 ; 0.644] | 0.58 [0.532 ; 0.628]  | 0.534 [0.478 ; 0.587] |
|          | ORD         | 0.595 [0.529 ; 0.664] | 0.607 [0.549 ; 0.667] | 0.604 [0.549 ; 0.654] | 0.573 [0.515 ; 0.626] |
|          | OVLT        | 0.727 [0.667 ; 0.777] | 0.704 [0.65 ; 0.755]  | 0.686 [0.632 ; 0.735] | 0.641 [0.58 ; 0.697]  |
|          | EVLTL       | 0.721 [0.659 ; 0.774] | 0.704 [0.649 ; 0.751] | 0.687 [0.631 ; 0.737] | 0.638 [0.572 ; 0.691] |
|          | ESB         | 0.634 [0.575 ; 0.694] | 0.641 [0.594 ; 0.695] | 0.635 [0.578 ; 0.683] | 0.598 [0.542 ; 0.66]  |
|          | ESLT        | 0.592 [0.532 ; 0.657] | 0.598 [0.543 ; 0.651] | 0.597 [0.541 ; 0.648] | 0.562 [0.505 ; 0.619] |
|          |             |                       |                       |                       |                       |
| B. AUC   | Null model* | 0.683 [0.625 ; 0.738] | 0.687 [0.632 ; 0.743] | 0.683 [0.627 ; 0.732] | 0.66 [0.603 ; 0.713]  |
|          | ORD*        | 0.705 [0.646 ; 0.757] | 0.703 [0.646 ; 0.754] | 0.702 [0.649 ; 0.752] | 0.674 [0.621 ; 0.724] |
|          | OVLT*       | 0.737 [0.677 ; 0.785] | 0.727 [0.673 ; 0.777] | 0.715 [0.657 ; 0.769] | 0.685 [0.627 ; 0.733] |
|          | EVLTL*      | 0.733 [0.67 ; 0.782]  | 0.725 [0.667 ; 0.776] | 0.715 [0.656 ; 0.771] | 0.681 [0.623 ; 0.732] |
|          | ESB*        | 0.696 [0.632 ; 0.752] | 0.701 [0.645 ; 0.755] | 0.697 [0.643 ; 0.748] | 0.676 [0.619 ; 0.729] |
|          | ESLT*       | 0.682 [0.621 ; 0.737] | 0.686 [0.629 ; 0.743] | 0.682 [0.627 ; 0.732] | 0.659 [0.603 ; 0.714] |
|          |             |                       |                       |                       |                       |
| C. Brier | Null Model  | 0.167 [0.148 ; 0.187] | 0.214 [0.198 ; 0.231] | 0.24 [0.228 ; 0.255]  | 0.264 [0.25 ; 0.28]   |
|          | ORD         | 0.168 [0.149 ; 0.189] | 0.215 [0.198 ; 0.232] | 0.241 [0.227 ; 0.256] | 0.263 [0.249 ; 0.279] |
|          | OVLT        | 0.148 [0.129 ; 0.168] | 0.191 [0.175 ; 0.214] | 0.215 [0.2 ; 0.234]   | 0.238 [0.221 ; 0.258] |
|          | EVLTL       | 0.148 [0.129 ; 0.169] | 0.191 [0.174 ; 0.213] | 0.215 [0.199 ; 0.235] | 0.239 [0.222 ; 0.259] |
|          | ESB         | 0.164 [0.145 ; 0.184] | 0.208 [0.192 ; 0.226] | 0.232 [0.218 ; 0.249] | 0.253 [0.235 ; 0.271] |
|          | ESLT        | 0.167 [0.147 ; 0.187] | 0.214 [0.197 ; 0.231] | 0.239 [0.225 ; 0.254] | 0.261 [0.247 ; 0.277] |
|          |             |                       |                       |                       |                       |
| D. Brier | Null model* | 0.158 [0.142 ; 0.181] | 0.199 [0.182 ; 0.217] | 0.218 [0.201 ; 0.235] | 0.235 [0.216 ; 0.253] |
|          | ORD*        | 0.153 [0.136 ; 0.175] | 0.194 [0.177 ; 0.215] | 0.212 [0.196 ; 0.23]  | 0.231 [0.213 ; 0.25]  |
|          | OVLT*       | 0.147 [0.131 ; 0.168] | 0.188 [0.171 ; 0.209] | 0.208 [0.192 ; 0.227] | 0.227 [0.209 ; 0.248] |
|          | EVLTL*      | 0.148 [0.131 ; 0.168] | 0.188 [0.171 ; 0.209] | 0.208 [0.191 ; 0.229] | 0.228 [0.211 ; 0.248] |
|          | ESB*        | 0.157 [0.141 ; 0.179] | 0.196 [0.178 ; 0.216] | 0.214 [0.196 ; 0.234] | 0.23 [0.212 ; 0.248]  |
|          | ESLT*       | 0.159 [0.142 ; 0.181] | 0.199 [0.182 ; 0.218] | 0.219 [0.201 ; 0.236] | 0.235 [0.216 ; 0.253] |

Null model: survival model stratified on study, ORD: observed relative decline, OVLT: observed value at landmark time, EVLT: estimated value at landmark time, ESB: estimated slope at baseline, ESLT: estimated slope at landmark time

\* models with CA-125 at baseline

Figure S9: 5-fold cross-validated AUC (A,B) and Brier score (C,D) for the prediction of overall survival at 24, 36, 48 and 60 months from CA125 history up to 6 months in Standard regimen arm when considering different CA125 summaries (ORD, OVLT, EVLT, ESB, ESLT) adjusted (B,D) or not (A,C) on the CA125 value at baseline. \* models with CA-125 at baseline

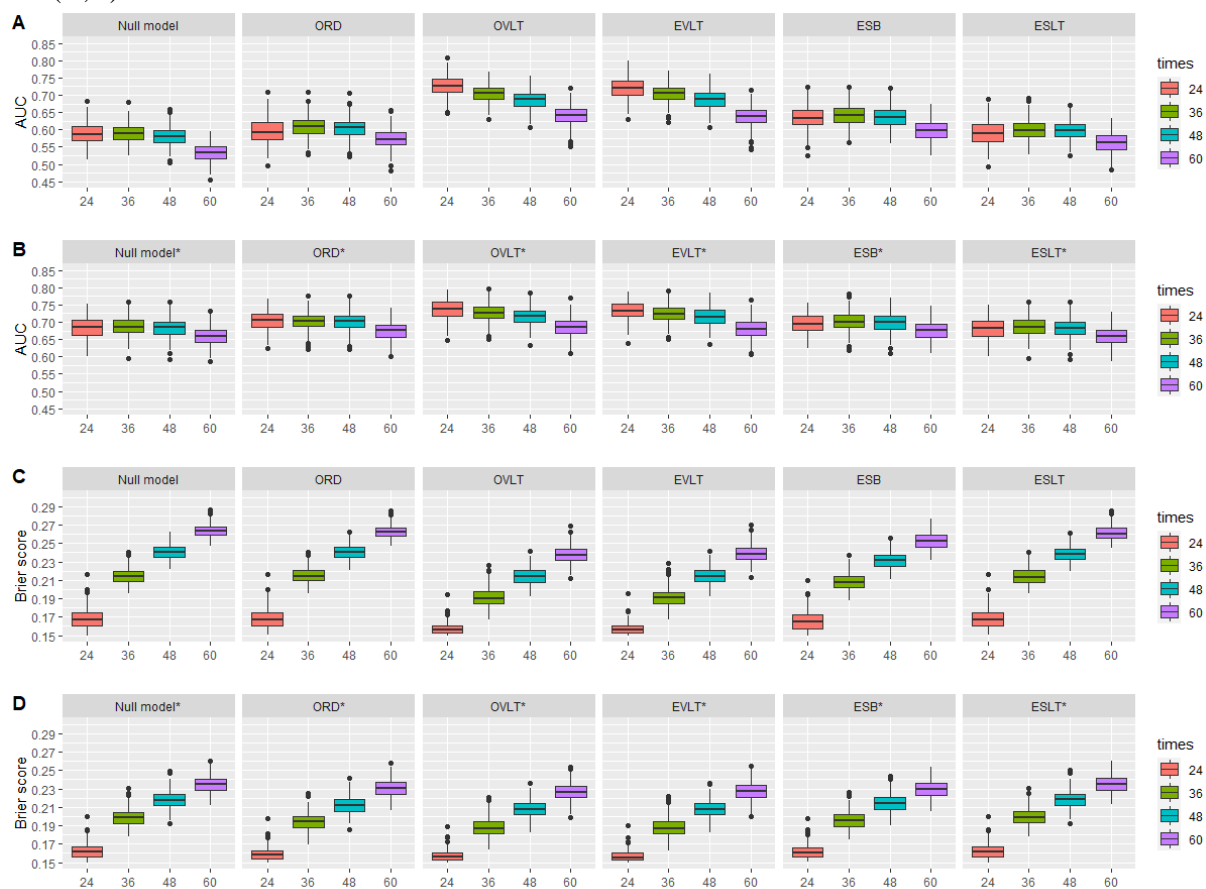

Supplement: s1 [file s1]
